# Supplementary material
Source: HighWire-hosted journal article supplement (https://bmjopen.bmj.com/content/14/7/e078049)
Supplement: inline-supplementary-material-2 [file inline-supplementary-material-2.pdf]

## Supplementary 1. Trial registration data

| Data category                                 | Information                                                                                          |
|-----------------------------------------------|------------------------------------------------------------------------------------------------------|
| Primary registry and trial identifying number | Line 44 page 4                                                                                       |
| Date of registration in primary registry      | April 1. 2023                                                                                        |
| Source(s) of monetary or material support     | Sun Yat-Sen Memorial Hospital, Sun Yat-Sen University                                                |
| Primary sponsor                               | Sun Yat-Sen Memorial Hospital, Sun Yat-Sen University                                                |
| Secondary sponsor(s)                          | the Jiangsu Simcere Pharmaceutical Co., Ltd., Jiangsu Simcere Diagnostics Co., Ltd                   |
| Contact for public queries                    | Xiaobo Huang, MD. [huangxbo@mail.sysu.edu.cn]                                                        |
| Contact for scientific queries                | Xiaobo Huang, MD. Sun Yat-Sen Memorial Hospital, Sun Yat-Sen University, Guangzhou, Guangdong, China |
| Public title                                  | <b>RIGAIN Study</b>                                                                                  |
| Scientific title                              | Line 3 page 3                                                                                        |
| Countries of recruitment                      | Line 29 page 4                                                                                       |
| Health condition(s) or problem(s) studied     | Regional lymph node irradiation                                                                      |
| Intervention(s)                               | Line 26 page 4                                                                                       |
| Key inclusion and exclusion criteria          | Table 1 Line 3 page 18                                                                               |
| Study type                                    | Line 27 page 4                                                                                       |
| Date of first enrolment                       | Line 38 page 4                                                                                       |
| Target sample size                            | Line 33 page 4                                                                                       |
| Recruitment status                            | Recruiting                                                                                           |
| Primary outcome(s)                            | Line 19 page 8                                                                                       |
| Key secondary outcomes                        | Line 19 page 8                                                                                       |
