# Supplementary material
Source: HighWire-hosted journal article supplement (https://bmjopen.bmj.com/content/14/7/e078049)
Supplement: inline-supplementary-material-4 [file inline-supplementary-material-4.pdf]

Supplementary 3. Breast Cancer Survival Quality Scale EORTC QLQ-BR23

Please recall if you have experienced any of these symptoms or the extent of the problem and tick the appropriate number“√”

| In the past 1 week                                                      | No | A little | More | A lot |
|-------------------------------------------------------------------------|----|----------|------|-------|
| 1. Do you have dry mouth?                                               | 1  | 2        | 3    | 4     |
| 2. Do your food and drinks taste different than usual?                  | 1  | 2        | 3    | 4     |
| 3. Do your eyes hurt, feel uncomfortable, or tear up?                   | 1  | 2        | 3    | 4     |
| 4. Do you have hair loss?                                               | 1  | 2        | 3    | 4     |
| 5. If you have hair loss, does it bother you?                           | 1  | 2        | 3    | 4     |
| 6. Do you feel sick or uncomfortable?                                   | 1  | 2        | 3    | 4     |
| 7. Is your face red and hot?                                            | 1  | 2        | 3    | 4     |
| 8. Do you have a headache?                                              | 1  | 2        | 3    | 4     |
| 9. Do you feel less physically attractive due to illness or treatment?  | 1  | 2        | 3    | 4     |
| 10. Do you feel less attractive as a woman due to illness or treatment? | 1  | 2        | 3    | 4     |
| 11. Do you have difficulty looking at your naked body?                  | 1  | 2        | 3    | 4     |
| 12. Are you dissatisfied with your body?                                | 1  | 2        | 3    | 4     |
| 13. Are you worried about your future health?                           | 1  | 2        | 3    | 4     |

| In the past 4 week                                                              | No | A little | More | A lot |
|---------------------------------------------------------------------------------|----|----------|------|-------|
| 14. How interested are you in sex?                                              | 1  | 2        | 3    | 4     |
| 15. How active are you sexually (do you have sex often)? (With or without sex?) | 1  | 2        | 3    | 4     |
| 16. If you have sex, to what extent does it bring you pleasure?                 | 1  | 2        | 3    | 4     |

| In the past 1 week                                                                         |
|--------------------------------------------------------------------------------------------|
| 17. Do you have pain in your arm or shoulder?                                              |
| 18. Is your arm or hand swollen?                                                           |
| 19. Do you have difficulty lifting or moving your arm to the side?                         |
| 20. Do you have pain in the area of your affected breast?                                  |
| 21. Is the area of your affected breast swollen?                                           |
| 22. Do you have hypersensitivity in the affected breast area?                              |
| 23.Do you have skin problems (e.g. itching, dryness, flaking) in the affected breast area? |
