# Supplementary material
Source: HighWire-hosted journal article supplement (https://bmjopen.bmj.com/content/14/7/e078049)
Supplement: inline-supplementary-material-5 [file inline-supplementary-material-5.pdf]

Supplementary 4. Evaluation criteria for common adverse events (CTCAE Version 4.03)  
(excerpt, normal common adverse event evaluation criteria is grade 0)

| Adverse Events                  | Grading                                                                                  |                                                                                                                                    |                                                                |                                                                                                  |       |
|---------------------------------|------------------------------------------------------------------------------------------|------------------------------------------------------------------------------------------------------------------------------------|----------------------------------------------------------------|--------------------------------------------------------------------------------------------------|-------|
|                                 | 1                                                                                        | 2                                                                                                                                  | 3                                                              | 4                                                                                                | 5     |
| Hemoglobin g/L                  | Normal value -10.0                                                                       | 10. 0–8. 0                                                                                                                         | 8. 0–6. 5                                                      | <6. 5                                                                                            |       |
| Leukocytes(10 <sup>9</sup> /L)  | Normal value-3.0                                                                         | 3. 0–2. 0                                                                                                                          | 2. 0–1. 0                                                      | <1. 0                                                                                            |       |
| Neutrophils(10 <sup>9</sup> /L) | Normal value-1.5                                                                         | 1. 5–1. 0                                                                                                                          | 1. 0–0. 5                                                      | <0. 5                                                                                            |       |
| Platelets(10 <sup>9</sup> /L)   | Normal value-75                                                                          | 75–50                                                                                                                              | 50–25                                                          | < 25                                                                                             |       |
| Transaminase<br>ALT/AST         | ≤2. 5×N                                                                                  | 2. 6–5. 0×N                                                                                                                        | 5. 1–20×N                                                      | >20×N                                                                                            |       |
| Alkaline phosphatase            | ≤2. 5×N                                                                                  | 2. 6–5. 0×N                                                                                                                        | 5. 1–20×N                                                      | >20×N                                                                                            |       |
| Bilirubin                       | ULN–1. 5×N                                                                               | 1. 5–3. 0×N                                                                                                                        | 3. 0–10×N                                                      | >10×N                                                                                            |       |
| Creatinine Cr                   | ULN–1. 5×N                                                                               | 1. 5–3. 0×N                                                                                                                        | 3. 0–10×N                                                      | >10×N                                                                                            |       |
| Weight gain/loss                | 5. 0–10%                                                                                 | 10–20%                                                                                                                             | ≥20%                                                           |                                                                                                  |       |
| Vomiting                        | Vomiting 1 time in 24h during treatment                                                  | Vomiting 2-5 times in 24h during treatment                                                                                         | Vomiting ≥ 6 times in 24h during treatment or requiring fluids | Life-threatening and requires urgent treatment                                                   | Death |
| Coughing sputum                 | Occasional/mild coughing of sputum                                                       | Moderate cough and sputum; interferes with instrumental daily life                                                                 | Persistent heavy coughing and limited personal self-care       |                                                                                                  |       |
| Pneumonia                       | Asymptomatic; clinical examination or diagnostic findings only; no intervention required | Symptomatic (mild cough and/or dyspnea, with or without fever); requires clinical intervention; interferes with instrumental daily | Severe symptoms; limited personal autonomy; need for oxygen    | Life-threatening respiratory dysfunction; requiring urgent treatment (tracheotomy or intubation) | Death |

|                                         |                                                                                                                                                                                      |                                                                                                                                                                               |                                                                                                                                  |                                                                                                                                   |       |
|-----------------------------------------|--------------------------------------------------------------------------------------------------------------------------------------------------------------------------------------|-------------------------------------------------------------------------------------------------------------------------------------------------------------------------------|----------------------------------------------------------------------------------------------------------------------------------|-----------------------------------------------------------------------------------------------------------------------------------|-------|
|                                         |                                                                                                                                                                                      | life                                                                                                                                                                          |                                                                                                                                  |                                                                                                                                   |       |
| Acute coronary syndrome                 |                                                                                                                                                                                      | Symptomatic, progressive angina; normal cardiac enzymes; hemodynamically stable                                                                                               | Symptomatic, unstable angina with/ or acute myocardial infarction, abnormal cardiac enzymatic parameters, hemodynamically stable | Symptomatic, unstable angina with/ or acute myocardial infarction, abnormal cardiac enzymatic parameters, hemodynamic instability | Death |
| Left ventricular systolic insufficiency |                                                                                                                                                                                      |                                                                                                                                                                               | Symptoms of decreased ejection fraction                                                                                          | Uncontrollable heart failure with declining ejection fraction requiring urgent intervention                                       | Death |
| Heart Failure                           | Asymptomatic, with abnormalities detected by laboratory tests (e.g., natriuretic peptide) or cardiac imaging                                                                         | Mild to moderate symptoms with activity or exercise                                                                                                                           | Symptoms occur at rest or with light activity or exercise; requires treatment                                                    | Life-threatening; requires urgent treatment (e.g. continuous infusion therapy or mechanically assisted circulation)               | Death |
| Limb edema                              | Comparison using the greatest difference in volume or circumference, with 5% to 10% variation between limbs; edema or blurred anatomy that can only be detected on close examination | Comparison using the largest difference in volume or circumference, 10% <~30% difference between limbs; disappearance of skin folds; apparent loss of limb anatomy, change in | >30% volume variation between limbs; severe changes in limb shape; limited personal autonomy                                     |                                                                                                                                   |       |

|                         |                                                                                     |                                                                                  |                                                                               |                                             |       |
|-------------------------|-------------------------------------------------------------------------------------|----------------------------------------------------------------------------------|-------------------------------------------------------------------------------|---------------------------------------------|-------|
|                         |                                                                                     | shape; interferes with instrumental daily living                                 |                                                                               |                                             |       |
| Neurotoxicity - Sensory | Mild sensory abnormalities (including paresthesia), absence of deep tendon reflexes | Moderate objective sensory deficit or sensory abnormalities (including tingling) | Severe objective sensory loss or sensory abnormalities that affect daily life | Persistent sensory loss, affecting function | Death |
| Neurotoxicity-motor     | Self-perceived weakness with no objective findings                                  | Moderate self-conscious weakness; no significant functional impairment           | Self-perceived weakness with functional impairment                            | Paralysis                                   | Death |

ULN, Upper limit of normal value
