# Supplementary material
Source: HighWire-hosted journal article supplement (https://bmjopen.bmj.com/content/14/7/e078049)
Supplement: inline-supplementary-material-10 [file inline-supplementary-material-10.pdf]

Supplementary 9. Radiation Target Volume Naming and Delineation

I. Purpose:

To ensure the smooth conduct of the clinical trial and to guarantee the quality of the clinical trial.

II. Scope:

This clinical trial.

III. Procedures:

- 一、General Principles of Target Delineation: To be performed on plain CT scans.
- 二、RNI + WBI (BCS)/CWI (Mastectomy)

| Standards         | 2.1 Whole Breast Target CTV_2                                                                                                                                                                                                                                           |
|-------------------|-------------------------------------------------------------------------------------------------------------------------------------------------------------------------------------------------------------------------------------------------------------------------|
| Superior Boundary | Upper edge of the palpable/CT-visible gland.                                                                                                                                                                                                                            |
| Inferior          | Lower edge of the palpable/CT-visible gland.                                                                                                                                                                                                                            |
| Anterior          | 5 mm beneath the skin; for small and thin breasts, adjust the anterior boundary to 0.3 cm beneath the skin or even closer.                                                                                                                                              |
| Posterior         | 1-2 mm behind the surface of the pectoralis major fascia (adjacent to the retromammary space), leaving no fat gap, including the lymph nodes between the pectoralis major and minor muscles and unsampled axillary levels I and II, excluding ribs/intercostal muscles. |
| Medial            | Parasternum, at least to the medial edge of the internal mammary vessels.                                                                                                                                                                                               |
| Lateral           | Lateral edge of the palpable/CT-visible gland, anterior to the thoracodorsal artery, and anterior edge of the latissimus dorsi muscle.                                                                                                                                  |

| Standards | 2.2Tumor Bed and CTV_1                                                                                                                                                                                                                                                                                                                                                                                                                                                    |
|-----------|---------------------------------------------------------------------------------------------------------------------------------------------------------------------------------------------------------------------------------------------------------------------------------------------------------------------------------------------------------------------------------------------------------------------------------------------------------------------------|
| Tumor Bed | The boundaries of the tumor bed are determined by: The positions of the surgical clips; it is recommended to place clips at five points: left, right, superior, inferior, and posterior.The extent of seroma, ensuring that any seroma within the gland and beneath the scar is included.                                                                                                                                                                                 |
| CTV_1     | Includes the breast glandular tissue and soft tissue extending 10-15 mm beyond the surgical tumor bed. For patients who underwent segmental resection, a smaller margin of around 10 mm is recommended. If there is no glandular tissue beyond the tumor bed, the margin can be appropriately reduced. For patients with positive margins, extensive intraductal component (EIC), or severe atypical ductal hyperplasia (ADH), the margin must be appropriately expanded. |

RIGAIN

|              |                                                                                    |                                                                           |                                                                                    |
|--------------|------------------------------------------------------------------------------------|---------------------------------------------------------------------------|------------------------------------------------------------------------------------|
| Standards    | 2.3 Integrated Target Volume CTV_2 for Whole Breast and Low/Mid Axillary Regions   |                                                                           |                                                                                    |
| Whole Breast | Refer to the Whole Breast Target CTV_2                                             |                                                                           |                                                                                    |
| Axilla       | Axillary Level I: Anatomically marked by the lateral edge of the pectoralis minor. |                                                                           |                                                                                    |
|              | Axillary Level I                                                                   | Axillary Level II                                                         | Rotter’s Lymph Nodes                                                               |
| Superior     | Where the axillary vessels cross the lateral edge of the pectoralis minor          | Where the axillary vessels cross the medial edge of the pectoralis minor  | Includes the superior side of the axillary artery and 5 mm above the axillary vein |
| Inferior     | Where the pectoralis major inserts into the ribs                                   | Where the axillary vessels cross the lateral edge of the pectoralis minor | Inferior boundary of Axillary Level II                                             |
| Anterior     | Anterior surface of the pectoralis major and latissimus dorsi                      | Anterior surface of the pectoralis minor                                  | Posterior surface of the pectoralis major                                          |
| Posterior    | Anterior surface of the subscapularis muscle                                       | Ribs and intercostal muscles                                              | Anterior surface of the pectoralis minor                                           |
| Medial       | Lateral edge of the pectoralis minor                                               | Medial edge of the pectoralis minor                                       | Medial edge of the pectoralis minor                                                |
| Lateral      | Medial surface of the latissimus dorsi                                             | Lateral edge of the pectoralis minor                                      | Lateral edge of the pectoralis minor                                               |

|                                                                                                                                                                                                                                                                 |                                                                                             |
|-----------------------------------------------------------------------------------------------------------------------------------------------------------------------------------------------------------------------------------------------------------------|---------------------------------------------------------------------------------------------|
| Standards                                                                                                                                                                                                                                                       | Chest Wall Target CTV_CW                                                                    |
| Superior                                                                                                                                                                                                                                                        | Clinical markers/subclavian head 0.5-1 cm                                                   |
| Inferior                                                                                                                                                                                                                                                        | Clinical markers/inferior edge of the contralateral breast fold                             |
| Anterior                                                                                                                                                                                                                                                        | Skin, excluding the wire                                                                    |
| Posterior                                                                                                                                                                                                                                                       | Ribs and intercostal muscles                                                                |
| Medial                                                                                                                                                                                                                                                          | Clinical markers/junction of the sternum and ribs                                           |
| Lateral                                                                                                                                                                                                                                                         | Clinical markers/thoracodorsal vessels and the anterior edge of the latissimus dorsi muscle |
| <b>Note:</b> <div><div>1. The entire scar should be included, and the target area should not be reduced within 2 cm above and below the scar.</div><div>2. Postoperative changes visible on CT (such as granulomas, fibrosis, and spiculated muscle</div></div> |                                                                                             |

RIGAIN

irritation signs) should be included.

| Standards                                                                                                                                                                                   | 2.5 Supraclavicular and Infraclavicular Lymph Node Area CTV_LN                                                                                                                                             |
|---------------------------------------------------------------------------------------------------------------------------------------------------------------------------------------------|------------------------------------------------------------------------------------------------------------------------------------------------------------------------------------------------------------|
| Superior                                                                                                                                                                                    | Inferior edge of the cricoid cartilage                                                                                                                                                                     |
| Inferior                                                                                                                                                                                    | 0.5-1 cm below the clavicular head, at the level where the brachiocephalic vein disappears, merging with the whole breast/chest wall target area                                                           |
| Anterior                                                                                                                                                                                    | Superior part: posterior surface of the sternocleidomastoid muscle; Inferior part: posterior surface of the pectoralis major muscle                                                                        |
| Posterior                                                                                                                                                                                   | Superior part: posterior edge of the anterior scalene muscle; Inferior part: anterior edge of the ribs and intercostal muscles                                                                             |
| Medial                                                                                                                                                                                      | Superior part: internal jugular vein, covering the interscalene triangle to the level of the transverse cervical artery and vein; Inferior part: junction of the subclavian vein and internal jugular vein |
| Lateral                                                                                                                                                                                     | Superior part: lateral edge of the sternocleidomastoid muscle; Inferior part: lateral edge of the pectoralis minor muscle                                                                                  |
| <b>Note:</b> <div><div>1. Avoid the surgically treated axillary area (Level I and part of Level II).</div><div>2. Include the non-surgically treated area of axillary Level II.</div></div> |                                                                                                                                                                                                            |

| Standards                                                                                                                                                                                                                                                                                                                         | 2.6 Internal Mammary Lymph Node Area CTV_IMN                                                                                                                                                           |
|-----------------------------------------------------------------------------------------------------------------------------------------------------------------------------------------------------------------------------------------------------------------------------------------------------------------------------------|--------------------------------------------------------------------------------------------------------------------------------------------------------------------------------------------------------|
| Superior                                                                                                                                                                                                                                                                                                                          | Injection into the internal area of the clavicle; for high-risk patients, extend to the junction of the internal jugular vein, subclavian vein, or brachiocephalic vein, and the internal mammary vein |
| Inferior                                                                                                                                                                                                                                                                                                                          | Upper edge of the fourth rib cartilage                                                                                                                                                                 |
| Anterior                                                                                                                                                                                                                                                                                                                          | Posterior surface of the pectoralis major muscle and the posterior surface of the sternum                                                                                                              |
| Posterior                                                                                                                                                                                                                                                                                                                         | Pleura or 5 mm behind the posterior aspect of the internal mammary vessels                                                                                                                             |
| Medial                                                                                                                                                                                                                                                                                                                            | 5 mm inside the internal mammary vessels, covering the space between the sternum and the vessels                                                                                                       |
| Lateral                                                                                                                                                                                                                                                                                                                           | 5 mm outside the internal mammary vessels, to the outer edge of the brachiocephalic vein                                                                                                               |
| <b>Note:</b> <div><div>1. For high-risk patients, the superior boundary extends to the junction of the internal jugular vein, subclavian vein, or brachiocephalic vein, and the internal mammary vein.</div><div>2. It is recommended to extend the coverage in the medial and lateral directions (at least) by 5 mm.</div></div> |                                                                                                                                                                                                        |

RIGAIN

|                                                                                                                                                                                                                                                                                                                                                                                                          |                                                       |
|----------------------------------------------------------------------------------------------------------------------------------------------------------------------------------------------------------------------------------------------------------------------------------------------------------------------------------------------------------------------------------------------------------|-------------------------------------------------------|
| Standards                                                                                                                                                                                                                                                                                                                                                                                                | 2.7 Intraclavicular Lymph Node CTV_intraclavicular-LN |
| Superior                                                                                                                                                                                                                                                                                                                                                                                                 | Level of the transverse cervical artery               |
| Inferior                                                                                                                                                                                                                                                                                                                                                                                                 | Upper edge of the brachiocephalic trunk               |
| Medial                                                                                                                                                                                                                                                                                                                                                                                                   | Midline of the body                                   |
| Lateral                                                                                                                                                                                                                                                                                                                                                                                                  | Inner boundary of the upper clavicle region           |
| <b>Note:</b><br>1. When irradiating the internal mammary lymph nodes, routine delineation is recommended.<br>2. When there is capsular invasion of the lymph nodes in the axillary Level II/III region, routine delineation is recommended.<br>3. Patients with primary tumor invasion of the deep fascia or tumors located medially and superiorly within the breast may be considered for delineation. |                                                       |

三、Omission of RNI, WBI (BCS) only, no CWI (total mastectomy)

|           |                                                                                                                                                                                                                                                                 |
|-----------|-----------------------------------------------------------------------------------------------------------------------------------------------------------------------------------------------------------------------------------------------------------------|
| Standard  | 3.1 Whole Breast Target CTV_2                                                                                                                                                                                                                                   |
| Superior  | Upper edge of palpable/CT-visible gland.                                                                                                                                                                                                                        |
| Inferior  | Lower edge of palpable/CT-visible gland.                                                                                                                                                                                                                        |
| Anterior  | Subcutaneous tissue 5 mm beneath the skin; for thin/small breasts, adjust anterior boundary to 0.3 cm beneath the skin or even closer.                                                                                                                          |
| Posterior | 1-2 mm behind the surface of the pectoralis major fascia (adjacent to the retromammary space), leaving no fat gap, excluding lymph nodes between pectoralis major and minor muscles and unsampled axillary levels I and II, excluding ribs/intercostal muscles. |
| Medial    | Parasternal, at least to the medial edge of the internal mammary vessels.                                                                                                                                                                                       |
| Lateral   | Lateral edge of palpable/CT-visible gland, anterior to the thoracodorsal artery, and anterior edge of the latissimus dorsi muscle.                                                                                                                              |

|                                           |                         |
|-------------------------------------------|-------------------------|
| Standard                                  | 3.2 Tumor Bed and CTV_1 |
| Refer to Standard 2.2 Tumor Bed and CTV_1 |                         |

|                                           |                                                                          |
|-------------------------------------------|--------------------------------------------------------------------------|
| Standard                                  | 3.3 Integrated Target Volume CTV_2 for Whole Breast and Low/Mid Axillary |
| Refer to Standard 2.3 Tumor Bed and CTV_1 |                                                                          |
