# Supplementary material
Source: HighWire-hosted journal article supplement (https://bmjopen.bmj.com/content/14/7/e078049)
Supplement: inline-supplementary-material-13 [file inline-supplementary-material-13.pdf]

Supplementary 12. Organ dose/volume/impact data for routine split exposures (except where noted):  
QUANTEC

| Organs      | Volume                                  | Type of irradiation (partial organ or specially indicated) | Observation index                 | Dose (Gy) or dose volume parameter | Incidence (%) | Dose volume parameter description                                             |
|-------------|-----------------------------------------|------------------------------------------------------------|-----------------------------------|------------------------------------|---------------|-------------------------------------------------------------------------------|
| Spinal Cord | Partial spinal cord<br>Thoracic medulla | 3DCRT                                                      | Spinal cord lesions               | Dmax=50                            | 0.02          | Includes all spinal cord cross-sections                                       |
| Pharynx     | pharyngeal constrictor muscle           | 3DCRT                                                      | Dysphagia and shortness of breath | Dmean<50                           | <20           |                                                                               |
| larynx      | Total larynx                            | 3DCRT                                                      | Edema                             | Dmean<44                           | <20           | No chemotherapy, based on a single study of patients without laryngeal cancer |
|             | Total larynx                            | 3DCRT                                                      | Edema                             | V50<27%                            | <20           |                                                                               |
| lung        | whole lung                              | 3DCRT                                                      | Pneumonia                         | V20≤30%                            | <20           | Double lung. Slow dose response<br>Without whole lung treatment irradiation   |
|             | whole lung                              | 3DCRT                                                      | Pneumonia                         | Dmean=7                            | 5             |                                                                               |
|             | whole lung                              | 3DCRT                                                      | Pneumonia                         | Dmean=13                           | 10            |                                                                               |
|             | whole lung                              | 3DCRT                                                      | Pneumonia                         | Dmean=20                           | 20            |                                                                               |
|             | whole lung                              | 3DCRT                                                      | Pneumonia                         | Dmean=24                           | 30            |                                                                               |
|             | whole lung                              | 3DCRT                                                      | Pneumonia                         | Dmean=27                           | 40            |                                                                               |
| Esophagus   | Whole Esophagus                         | 3DCRT                                                      | ≥3 Grade acute esophagitis        | Dmean<34                           | 5-20          | Contains various dose limiting factors. Seems to be related to dose volume    |
|             | Whole Esophagus                         | 3DCRT                                                      | ≥ grade 2 acute esophagitis       | V35<50%                            | <30           |                                                                               |
|             | Whole Esophagus                         | 3DCRT                                                      | ≥ grade 2 acute esophagitis       | V50<40%                            | <30           |                                                                               |
| heart       | Pericardium                             | 3DCRT                                                      | pericarditis                      | Dmean<26                           | <15           | Based on individual studies                                                   |
|             | Pericardium                             | 3DCRT                                                      | pericarditis                      | V30<46%                            | <15           |                                                                               |
|             | Whole heart                             | 3DCRT                                                      | distant cardiac                   | V25<46%                            | <1            | High standards for                                                            |

|       |                   |       |              |             |     |                                                                                                                                                            |
|-------|-------------------|-------|--------------|-------------|-----|------------------------------------------------------------------------------------------------------------------------------------------------------------|
|       |                   |       | death        |             |     | assessing security based on predictive models                                                                                                              |
| Liver | Whole Liver - GTV | 3DCRT | Typical RILD | Dmean<30-32 | <5  | Exclude patients with existing liver disease or liver cancer                                                                                               |
|       | Whole Liver - GTV | 3DCRT | Typical RILD | Dmean<42    | <50 | Patients with liver disease or hepatocellular carcinoma with a Child-Pugh rating of A, but not active hepatitis B, were included as observation indicators |
|       | Whole Liver - GTV | 3DCRT | Typical RILD | Dmean<28    | <5  |                                                                                                                                                            |
|       | Whole Liver - GTV | 3DCRT | Typical RILD | Dmean<36    | <50 |                                                                                                                                                            |
|       | Whole stomach     | 3DCRT | Ulcer        | D100<45     | <7  |                                                                                                                                                            |

QUANTEC: Quantitative Analysis of Illumination Response in Clinically Normal Tissues; 3DCRT: Three-Dimensional Conformal Radiotherapy; GTV: Gross Tumor Volume; RILD: Radioactive Liver Injury; RTOG: Radiation Therapy Oncology Group of Amer
