# Supplementary material
Source: HighWire-hosted journal article supplement (https://bmjopen.bmj.com/content/14/7/e078049)
Supplement: inline-supplementary-material-14 [file inline-supplementary-material-14.pdf]

Supplementary 13. Research Schedule

| Research Phase               | Screening | Radiotherapy period |    |    |      | Follow up period |     |     |     |     |     |     |     |     |     |                           |
|------------------------------|-----------|---------------------|----|----|------|------------------|-----|-----|-----|-----|-----|-----|-----|-----|-----|---------------------------|
| Visits                       | 1         | 2                   | 3  | 4  | 5    | 6                | 7   | 8   | 9   | 10  | 11  | 12  | 13  | 14  | 15  |                           |
| Time                         | -3M-0     | 1W                  | 2W | 3W | 4-7W | 6M               | 12M | 18M | 24M | 30M | 36M | 42M | 48M | 54M | 60M | In the event of a relapse |
| Informed consent             | ×         |                     |    |    |      |                  |     |     |     |     |     |     |     |     |     |                           |
| Inclusion/exclusion criteria | ×         |                     |    |    |      |                  |     |     |     |     |     |     |     |     |     |                           |
| Frozen/paraffin tissue       | ×         |                     |    |    |      |                  |     |     |     |     |     |     |     |     |     |                           |
| Pathology                    | ×         |                     |    |    |      |                  |     |     |     |     |     |     |     |     |     |                           |
| Tumor markers                | ×         |                     |    |    |      | ×                | ×   | ×   | ×   | ×   | ×   | ×   | ×   | ×   | ×   | ×                         |
| Breast + LN ultrasound/MR    | ×         |                     |    |    |      | ×                | ×   | ×   | ×   | ×   | ×   | ×   | ×   | ×   | ×   |                           |
| Mammography                  | ×         |                     |    |    |      |                  | ×   |     | ×   |     | ×   |     | ×   |     | ×   |                           |
| Chest X-ray/CT               | ×         |                     |    |    |      | ×                | ×   | ×   | ×   | ×   | ×   | ×   | ×   | ×   | ×   | ×                         |
| Abdominal ultrasound/CT      | ×         |                     |    |    |      | ×                | ×   | ×   | ×   | ×   | ×   | ×   | ×   | ×   | ×   | ×                         |
| Thyroid + LN ultrasound      | ×         |                     |    |    |      | ×                | ×   | ×   | ×   | ×   | ×   | ×   | ×   | ×   | ×   |                           |
| Bone Scan                    | ×         |                     |    |    |      |                  | ×   |     | ×   |     | ×   |     | ×   |     | ×   | ×                         |
| Cranial CT/MRI               |           |                     |    |    |      |                  |     |     |     |     |     |     |     |     |     | ×                         |
| Demographic features         | ×         |                     |    |    |      |                  |     |     |     |     |     |     |     |     |     |                           |
| Medical history              | ×         |                     |    |    |      |                  |     |     |     |     |     |     |     |     |     |                           |
| Physical examination         | ×         | ×                   | ×  | ×  | ×    | ×                | ×   | ×   | ×   | ×   | ×   | ×   | ×   | ×   | ×   |                           |

|                                                                                                                                                                                                                                                                                                                                            |     |   |   |   |   |   |   |   |   |   |   |   |   |   |   |   |
|--------------------------------------------------------------------------------------------------------------------------------------------------------------------------------------------------------------------------------------------------------------------------------------------------------------------------------------------|-----|---|---|---|---|---|---|---|---|---|---|---|---|---|---|---|
| Upper and lower arm circumference measurement◆                                                                                                                                                                                                                                                                                             | ×   |   |   |   | × |   | × |   | × |   | × |   | × |   | × |   |
| Body weight                                                                                                                                                                                                                                                                                                                                | ×   |   |   |   | × |   | × |   | × |   | × |   | × |   | × |   |
| ECOG score                                                                                                                                                                                                                                                                                                                                 | ×   |   |   |   | × |   | × |   | × |   | × |   | × |   | × |   |
| Blood count                                                                                                                                                                                                                                                                                                                                | ×** | × | × | × | × | × | × | × | × | × | × | × | × | × | × | × |
| Liver and kidney function                                                                                                                                                                                                                                                                                                                  | ×** |   |   |   | × | × | × | × | × | × | × | × | × | × | × | × |
| Infectious disease                                                                                                                                                                                                                                                                                                                         | ×*  |   |   |   |   |   |   |   |   |   |   |   |   |   |   |   |
| Serum pregnancy test                                                                                                                                                                                                                                                                                                                       | ×** |   |   |   |   |   |   |   |   |   |   |   |   |   |   |   |
| EORTC QLQ-C30                                                                                                                                                                                                                                                                                                                              | ×** |   |   |   | × |   | × |   | × |   | × |   | × |   | × |   |
| EORTC QLQ-BR23                                                                                                                                                                                                                                                                                                                             | ×** |   |   |   | × |   | × |   | × |   | × |   | × |   | × |   |
| Harris                                                                                                                                                                                                                                                                                                                                     | ×** |   |   |   |   |   | × |   | × |   | × |   | × |   | × |   |
| Baker                                                                                                                                                                                                                                                                                                                                      | ×** |   |   |   |   |   | × |   | × |   | × |   | × |   | × |   |
| CTCAE V4.03                                                                                                                                                                                                                                                                                                                                | ×** | × | × | × | × |   | × | × | × |   | × |   | × |   | × |   |
| Acute radiation reaction                                                                                                                                                                                                                                                                                                                   |     | × | × | × | × |   |   |   |   |   |   |   |   |   |   |   |
| Late radiation injury                                                                                                                                                                                                                                                                                                                      |     |   |   |   |   |   | × | × | × |   | × |   | × |   | × |   |
| ◆Upper and lower arm circumference measurements: measured at the bilateral metacarpophalangeal joints (mid-metacarpal), at the wrist, and at the distal 10 cm and proximal 15 cm of the elbow epicondyle.<br>* Within 12 months prior to randomization<br>** Within 14 days before randomization<br>*** When cranial symptoms were present |     |   |   |   |   |   |   |   |   |   |   |   |   |   |   |   |
